# Supplementary material for: Sustainable biobased blends of poly(lactic acid) (PLA) and poly(glycerol succinate-co-maleate) (PGSMA) with balanced performance prepared by dynamic vulcanization
Source: Royal Society of Chemistry journal article supplement (doi:10.1039/c7ra06612k), 2017-01-01
Supplement: c7ra06612k1.pdf [file c7ra06612k1.pdf]

## Supporting information

### **Sustainable biobased blends of poly (lactic acid) (PLA) and poly (glycerol succinate-co-maleate) (PGSMA) with balanced performance prepared by dynamic vulcanization**

Oscar Valerio<sup>a, b</sup>, Manjusri Misra<sup>a, b</sup>, Amar K. Mohanty<sup>a, b, \*</sup>

*<sup>a</sup>School of Engineering, Thornbrough Building, University of Guelph, Guelph, N1G 2W1, Ontario, Canada*

*<sup>b</sup>Bioproducts Discovery and Development Centre, Department of Plant Agriculture, Crop Science Building, University of Guelph, Guelph, N1G 2W1, Ontario, Canada*

\*Corresponding author. E-mail: mohanty@uoguelph.ca. Tel.: +1-519-824-4120 ext 56664. Fax: +1-519-763-8933.

## Supporting info contents

Fig. S1 Crystallinity percentage of PLA, glass transition of the PGSMA phase and gel fraction of dynamically vulcanized 80/20 wt% PLA/PGSMA blends.

Fig. S2 Tensile strength and modulus of dynamically vulcanized 80/20 wt% PLA/PGSMA blends. Dashed line represents a low interfacial adhesion model ( $B=0$ ) for 80/20 wt% PLA/PGSMA blends.

Fig. S3 Elongation at break and notched Izod impact of dynamically vulcanized 80/20 wt% PLA/PGSMA blends at different free radical initiator loadings.

Fig. S4 Differential scanning calorimetry analysis of dynamically vulcanized 80/20 wt% PLA/PGSMA blends using different free radical initiator loadings. Second heating cycle data is shown.

Fig. S5 Tensile modulus and elongation at break of dynamically vulcanized PLA/PGSMA blends.

Fig. S6 Linearization of tensile strength data of dynamically vulcanized PLA/PGSMA blends for calculation of B parameter on Pukanszky model for tensile strength.

Fig. S7 Tensile strength of dynamically vulcanized PLA/PGSMA blends (black) and Pukanszky model for tensile strength with two different adhesion levels (red and blue).

Table S1 Glass transition temperature of PLA phase and melt flow index of dynamically vulcanized 80/20 wt% PLA/PGSMA blends in the presence of different free radical initiator loadings

Table S2 Morphological parameters of PGSMA phase on dynamically vulcanized PLA/PGSMA blends

Table S3 Normalized ligament thickness ( $T$ ) and gel fraction ( $W_{gel}$ ) and experimental data of notched Izod impact ( $IS$ ) on dynamically vulcanized PLA/PGSMA blends.

Total number of pages: 7

Total number of figures: 7

Total number of tables: 3

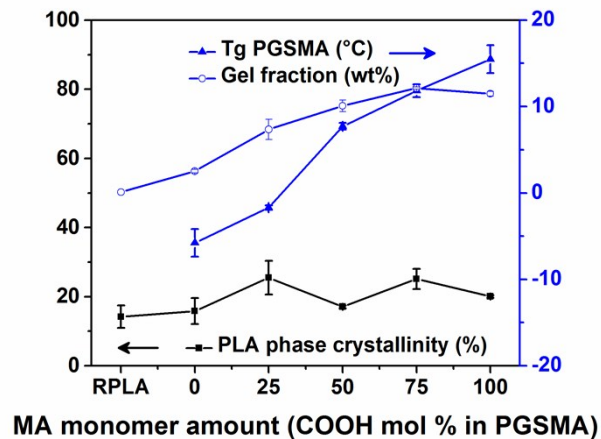

Fig. S1 Crystallinity percentage of PLA, glass transition of the PGSMA phase and gel fraction of dynamically vulcanized 80/20 wt% PLA/PGSMA blends.

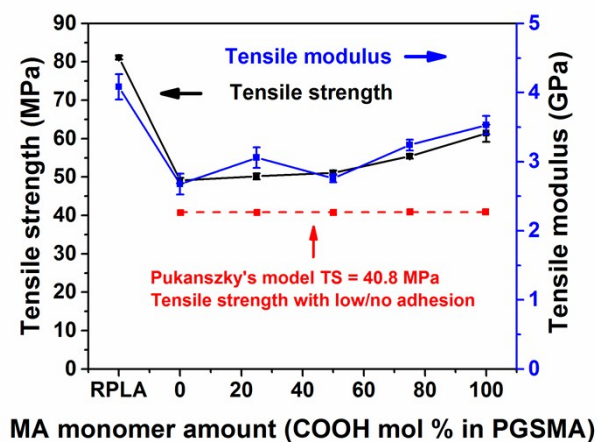

Fig. S2 Tensile strength and modulus of dynamically vulcanized 80/20 wt% PLA/PGSMA blends. Dashed line represents a low interfacial adhesion model ( $B=0$ ) for 80/20 wt% PLA/PGSMA blends.

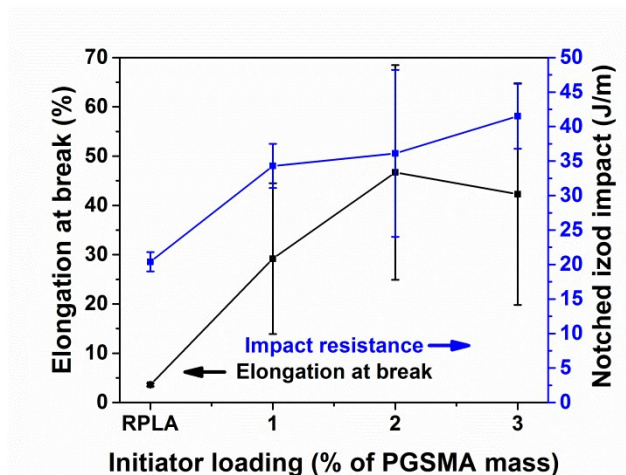

Fig. S3 Elongation at break and notched Izod impact of dynamically vulcanized 80/20 wt% PLA/PGSMA blends at different free radical initiator loadings.

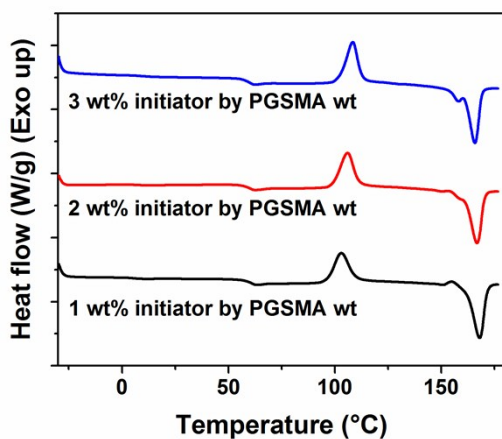

Fig. S4 Differential scanning calorimetry analysis of dynamically vulcanized 80/20 wt% PLA/PGSMA blends using different free radical initiator loadings. Second heating cycle data is shown.

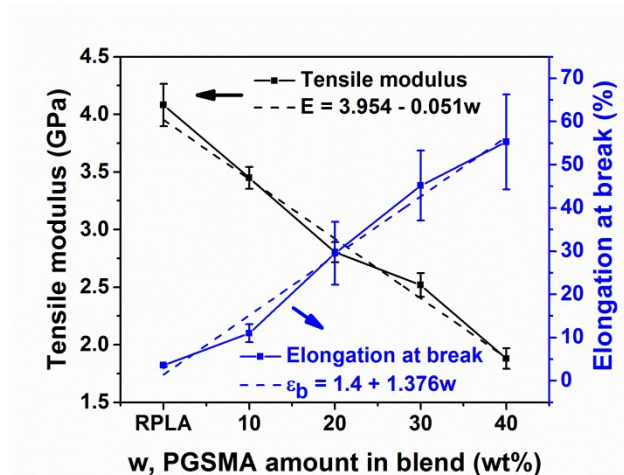

Fig. S5 Tensile modulus and elongation at break of dynamically vulcanized PLA/PGSMA blends.

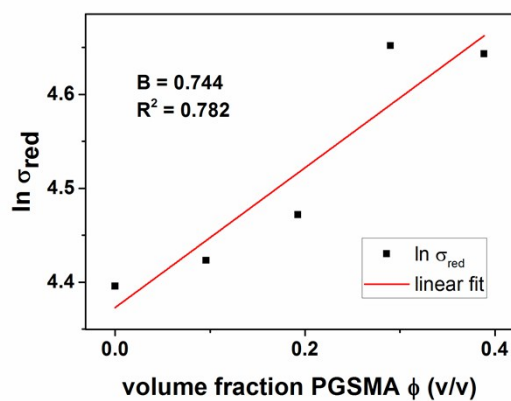

Fig. S6 Linearization of tensile strength data of dynamically vulcanized PLA/PGSMA blends for calculation of B parameter on Pukanszky model for tensile strength.

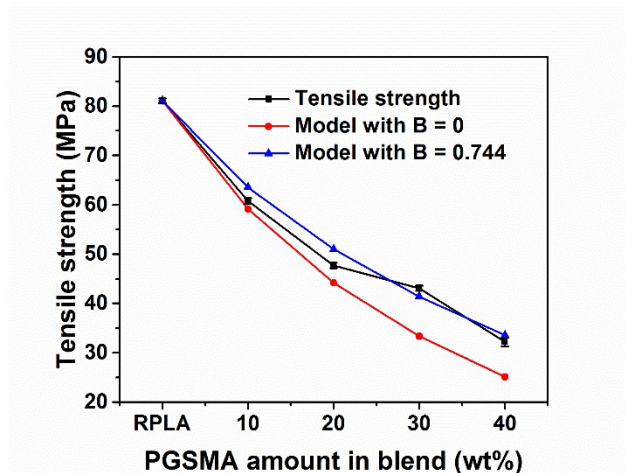

Fig. S7 Tensile strength of dynamically vulcanized PLA/PGSMA blends (black) and Pukanszky model for tensile strength with two different adhesion levels (red and blue).

Table S1 Glass transition temperature of PLA phase and melt flow index of dynamically vulcanized 80/20 wt% PLA/PGSMA blends in the presence of different free radical initiator loadings

| Initiator content in<br>blend (wt% with<br>respect to PGSMA) | T <sub>g</sub> PLA<br>(°C) | Melt flow index (g/10 min)<br>(190°C, 2.16 kg) |
|--------------------------------------------------------------|----------------------------|------------------------------------------------|
| 1                                                            | 60.6 ± 0.1                 | 23.7 ± 0.8                                     |
| 2                                                            | 59.5 ± 0.5                 | 38.6 ± 0.8                                     |
| 3                                                            | 58.2 ± 0.8                 | 36.1 ± 1.3                                     |

Table S2 Morphological parameters of PGSMA phase on dynamically vulcanized PLA/PGSMA blends

| <b>Blend</b>    | <b>d (μm)</b> | <b>σ</b> | <b>Φ<sub>d</sub> (v/v)</b> | <b>T (μm)</b> |
|-----------------|---------------|----------|----------------------------|---------------|
| 60/40 PLA/PGSMA | 0.649         | 0.49     | 0.43                       | 0.651         |
| 70/30 PLA/PGSMA | 0.532         | 0.51     | 0.33                       | 0.563         |
| 80/20 PLA/PGSMA | 0.467         | 0.49     | 0.22                       | 0.736         |
| 90/10 PLA/PGSMA | 0.469         | 0.58     | 0.11                       | 0.682         |

Table S3 Normalized ligament thickness (T) and gel fraction (W<sub>gel</sub>) and experimental data of notched Izod impact (IS) on dynamically vulcanized PLA/PGSMA blends.

| <b>Blend</b>     | <b>T (μm)</b> | <b>W<sub>gel</sub> (wt%)</b> | <b>T'</b> | <b>W'</b> | <b>IS (J/m)</b> |
|------------------|---------------|------------------------------|-----------|-----------|-----------------|
| 60/40 RPLA/PGSMA | 0.651         | 16.6                         | 0.51      | 1         | 55.4            |
| 70/30 RPLA/PGSMA | 0.563         | 12.5                         | 0         | 0.67      | 37.3            |
| 80/20 RPLA/PGSMA | 0.736         | 7.5                          | 1         | 0.28      | 40.5            |
| 90/10 RPLA/PGSMA | 0.682         | 4                            | 0.69      | 0         | 27.6            |
